# Supplementary material
Source: MDPI journal article supplement (https://www.mdpi.com/2073-4395/10/8/1107)
Supplement: s1 [file s1]

## Supplementary Materials

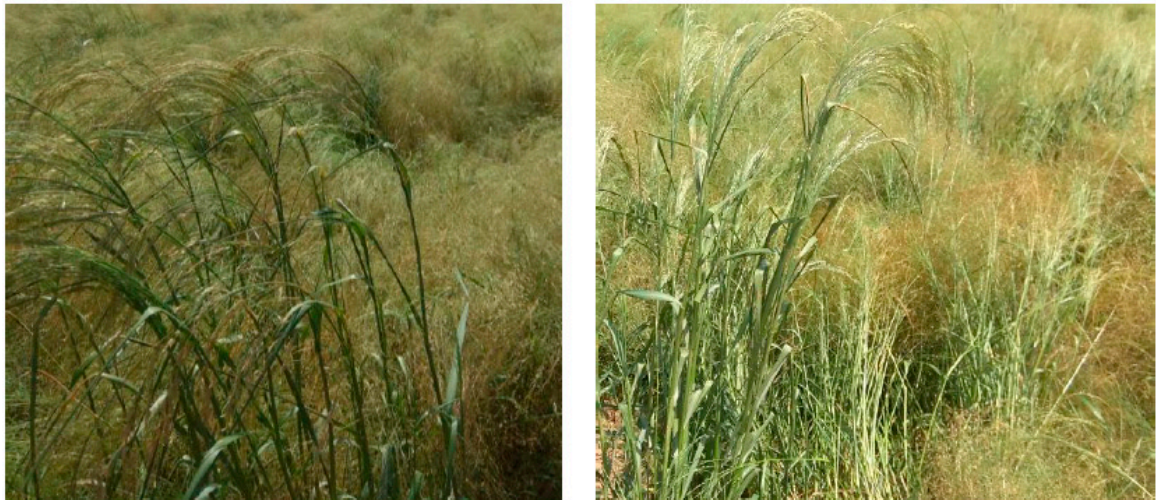

**Figure S1.** Two examples of teff plants that didn't exhibit lodging in original plot locations. From these plants, and from other plants spotted, a single spike was collected for establishing the current seed collection.

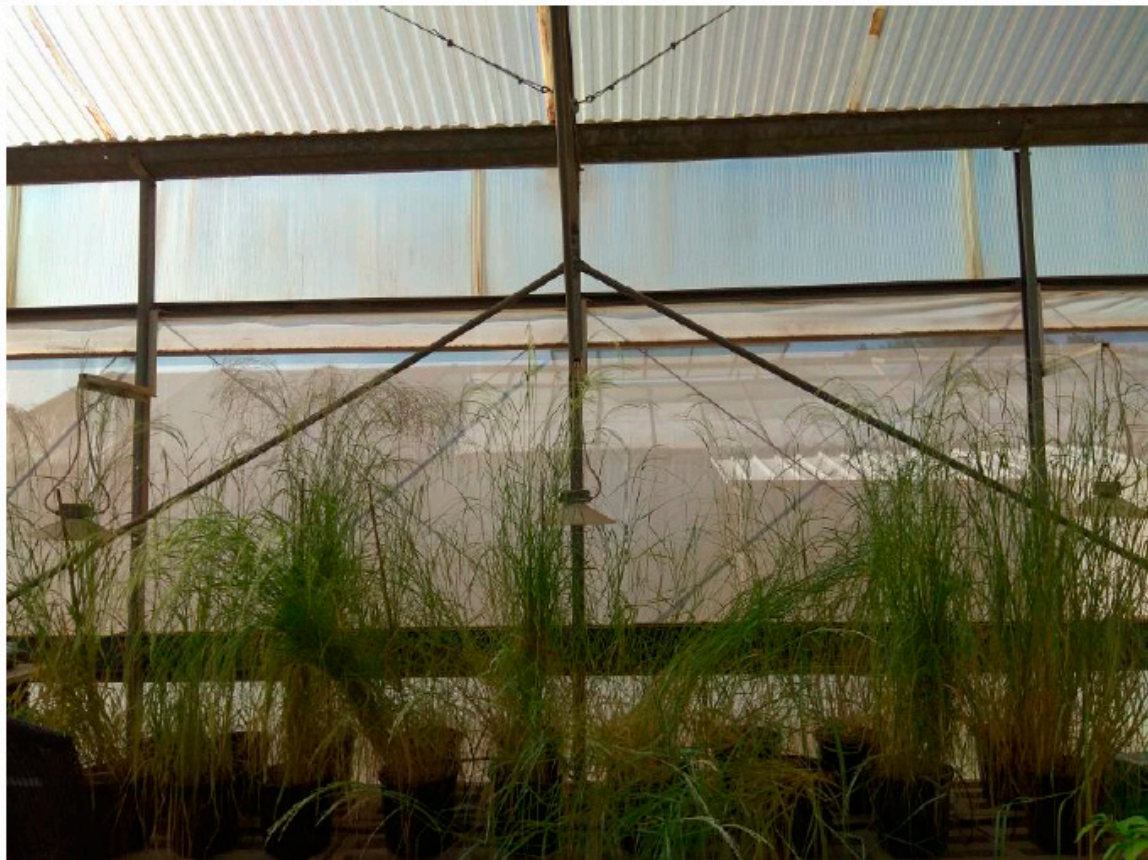

**Figure S2.** Populations collection propagated in the greenhouse off season. Each population originated from a single spike was sown in on pot.

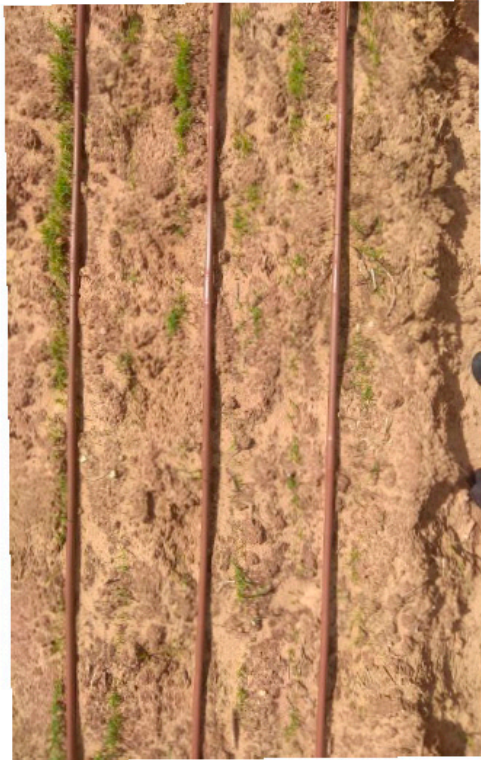

0.9 m x 2 m plot

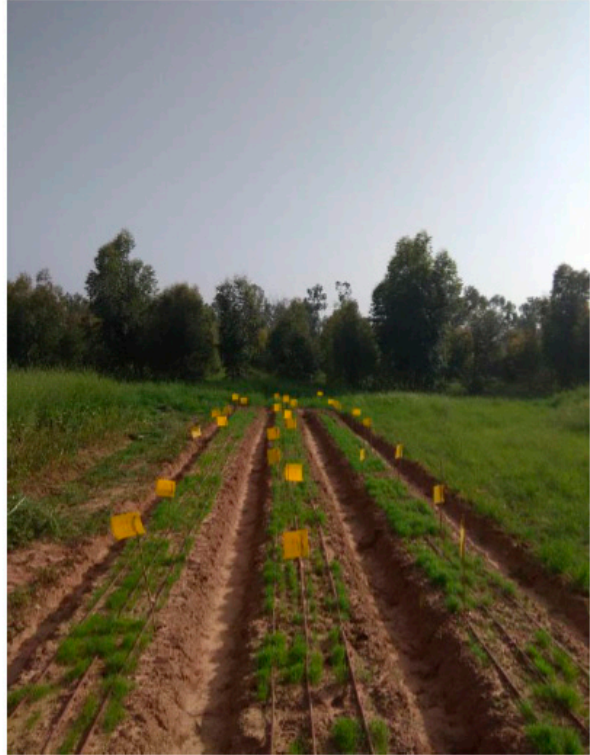

24 DAS

**Figure S3.** A field experimental plot design as well as an overview of the field at early (24 DAS) growth stages.



53-1-W

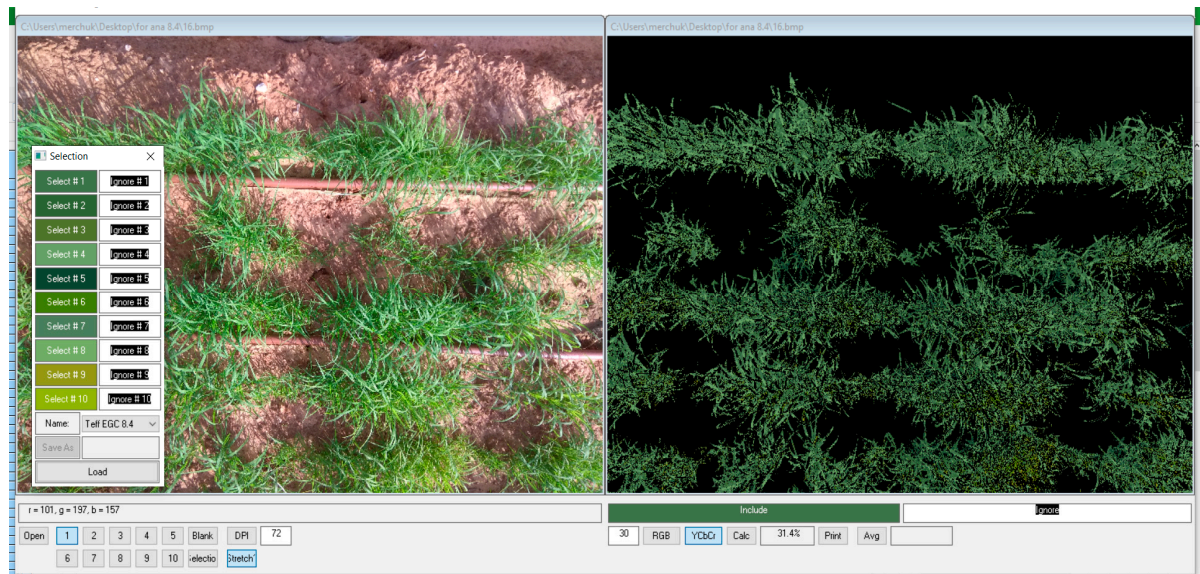

White

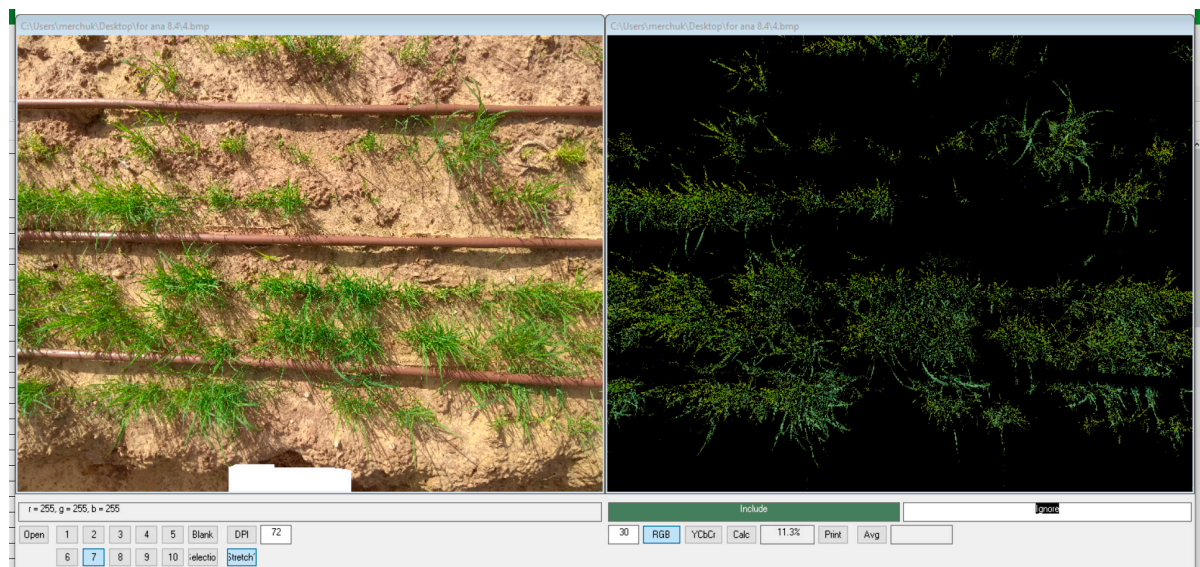

**Figure S4.** Early growth cover evolution of plots in the field experiment. Images were analyzed using the *Coveragetool* (ref).

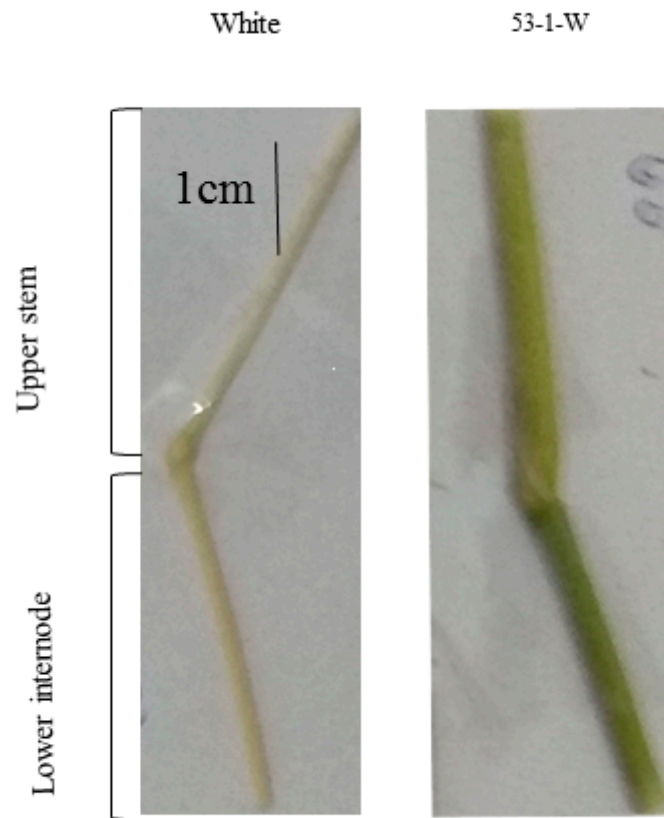

**Figure S5.** Projected stem width of the first lowest node which bears one leaf ('Upper') and, b) the most basal internode ('Lower', below a), measured at 70 DAS.

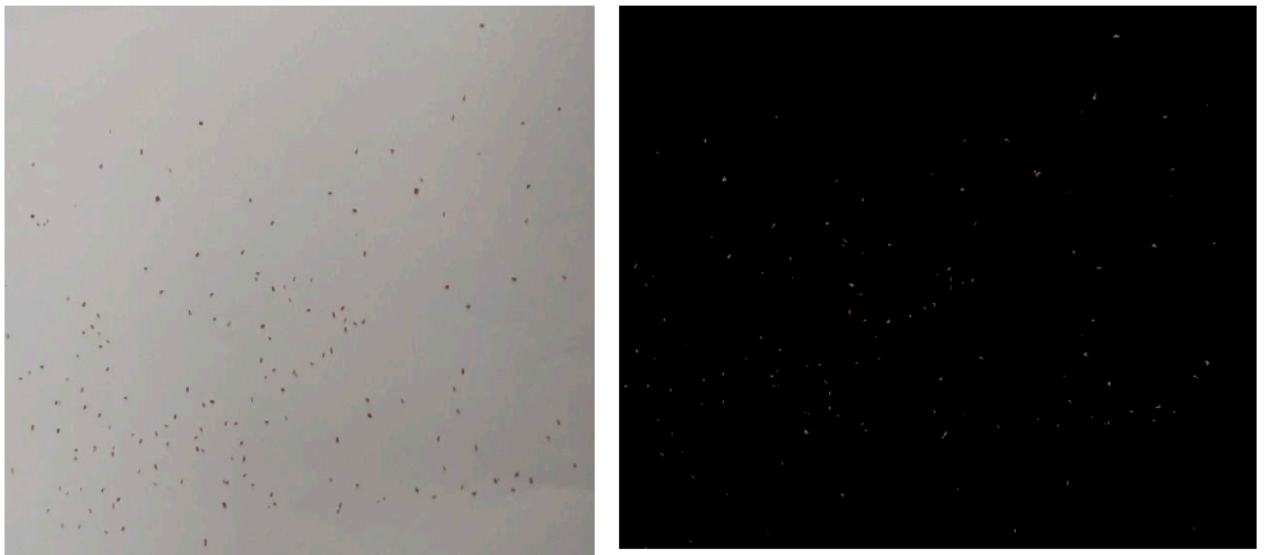

**Figure S6.** As a part of the process of average grain weight (AGW) evaluation, seeds were spread over a white sheet and photographed. For each plot the image was threshold using 'coveragetool' (by sampling seeds to account) to be further processed by Image J's particle count tool.



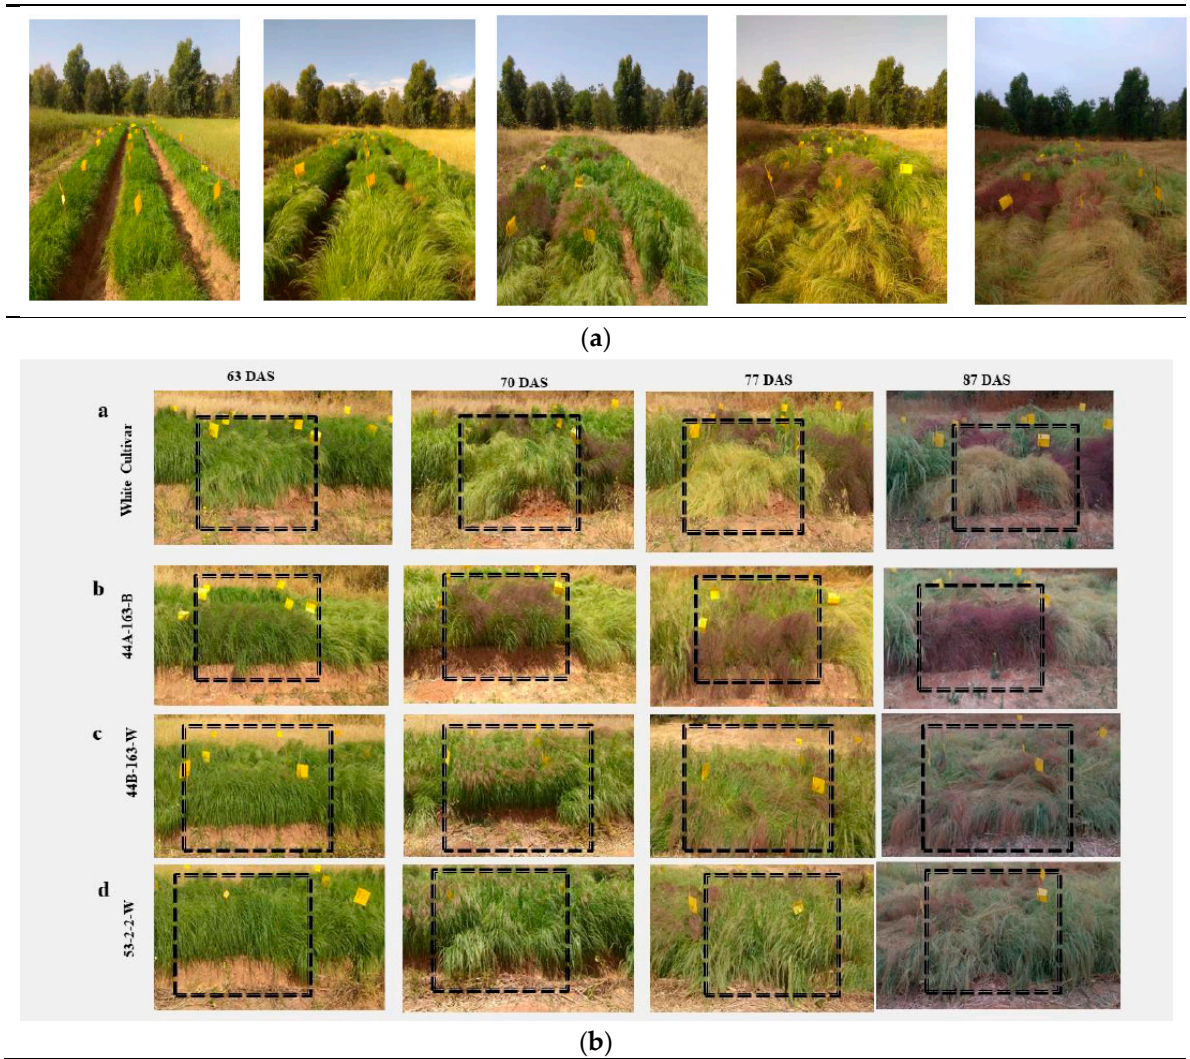

**Figure S7. (a)** A general overview of the ARO filed experiment which shows the wide phenotypic variance of the genetic material. **(b)** A survey on one of the: a) White, b) 44A-163-B, c) 44B-163-W, and d) 53-2-2-W plots at: 63,70,77,87 days after sawing at the ARO field experiment. The dashed boxes is distinctive of the subjected plot.

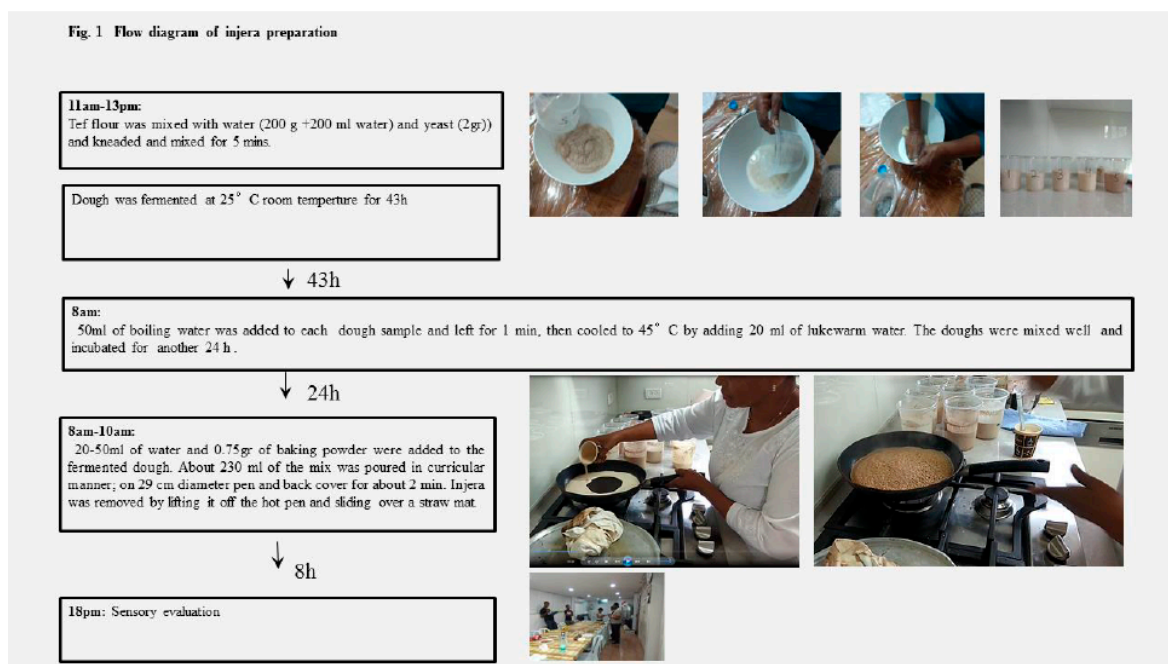

**Figure S8.** Flow diagram of Injera preparation.

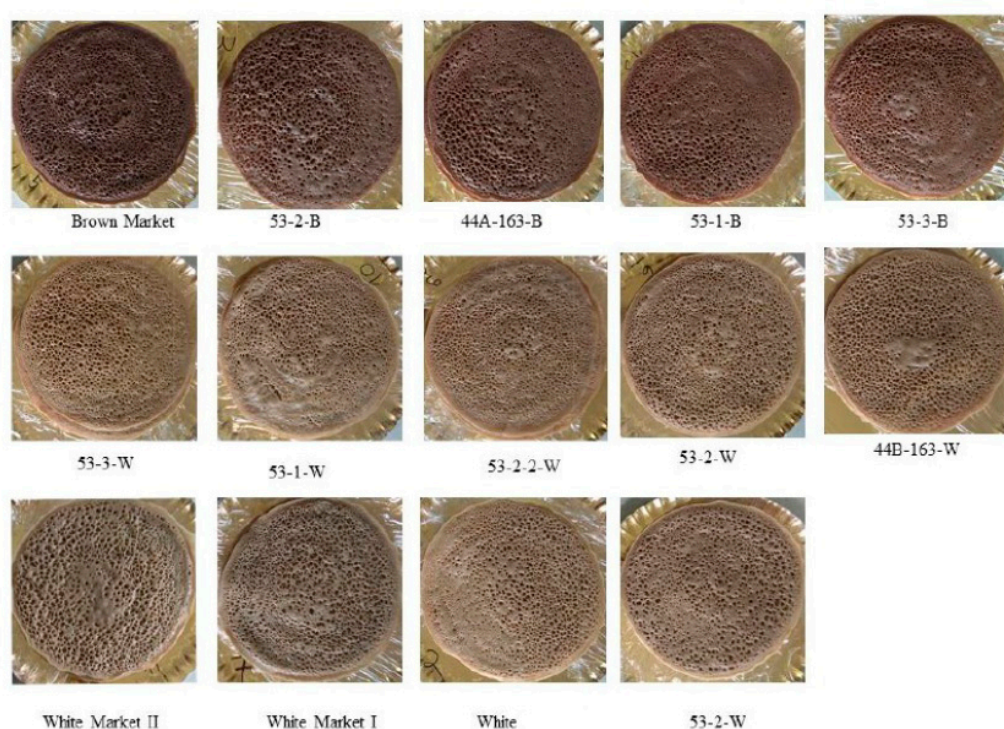

**Figure S9.** Images of Injera flat beard made from of each of the 11 populations characterized in the field experiment as well as three market controls.
